# Supplementary material for: Multi-Channel Metabolomics Analysis Identifies Novel Metabolite Biomarkers for the Early Detection of Fatty Liver Disease in Dairy Cows
Source: MDPI journal article supplement (doi:10.3390/cells11182883), 2022-09-15
Supplement: s1 [file s1]

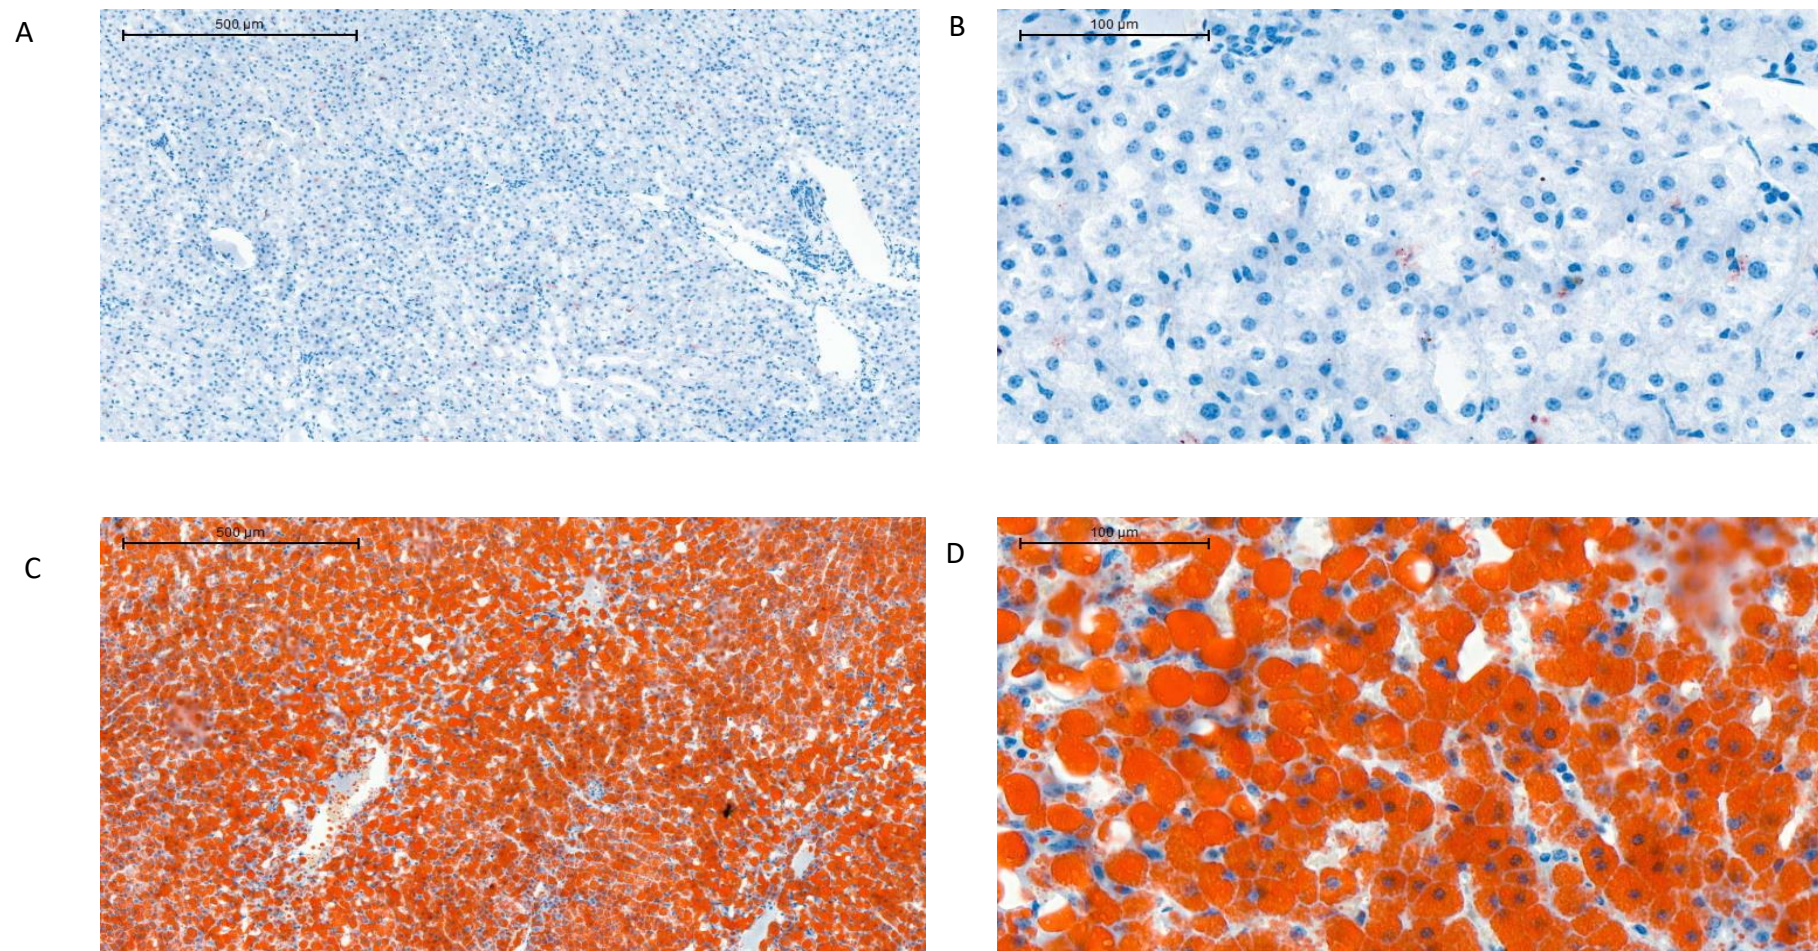

**Fig. S1** Oil red O staining revealed the significant lipid accumulation in the fatty liver tissue (C and D), compared with normal control animal (A and B). Red represents stained fat in the cell.

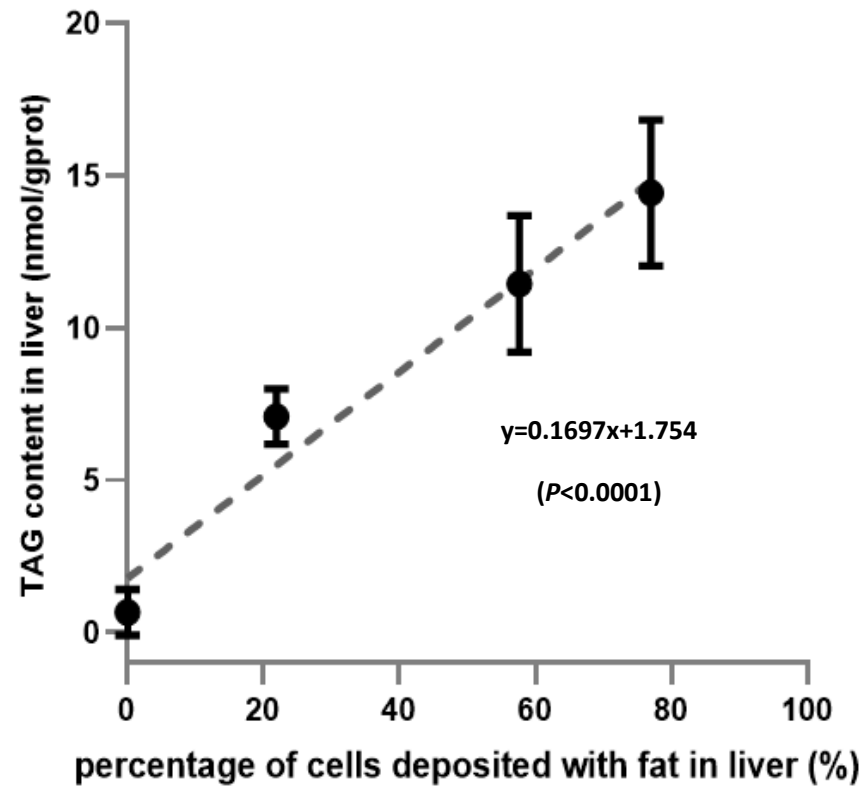

**Fig. S2** The TAG content (nmol/g protein) in liver were assessed in representative normal of fatty liver samples, indicating that the values of fatty cell percentage (%) quantitated by liver biopsy in the study were positively correlated with liver TAG content.

A

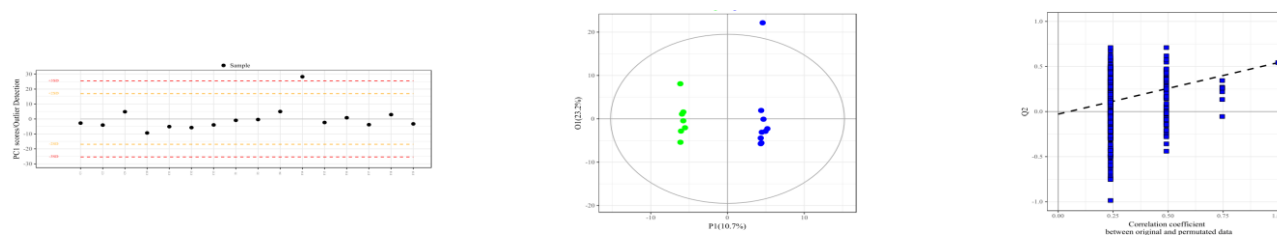

B

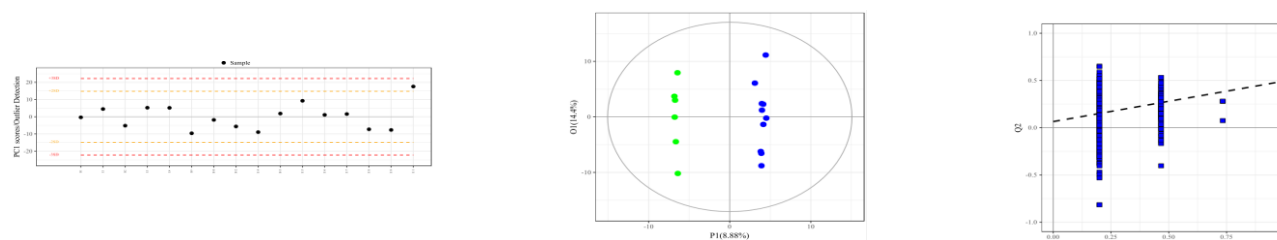

C

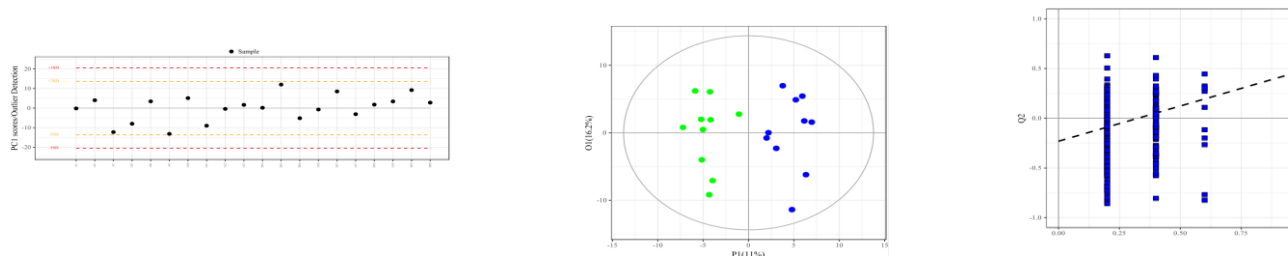

**Fig. S3.** Quality control and model credibility assessment of samples in the Test set (cows strictly selected by serological detection) from feces (A), urine (B) and serum (C). (Left panel) Multivariate control chart (MCC) shown the metabolite profiles of all individual feces (A), urine (B) and serum (C) samples in the Discovery set. Black dot represents a single sample. Orange and/or red dashed line represents biological quality control range limit. (Middle panel) Orthogonal partial least squares discriminant analysis (OPLS-DA) maps of the samples from feces (A), urine (B) and serum (C), revealing a significant separation of fatty liver group from normal control group, without any overlapping, indicating a successful model construction in the study. (Right panel) The modeling ( $R^2Y$ ) and predictive ability ( $Q^2Y$ ) of OPLS-DA map of samples from feces (A, 0.998 and 0.646, respectively), urine (B, 0.952 and 0.108, respectively) and serum (C, 0.901 and 0.215, respectively). To avoid over-fitting of the model, 999 random permutation tests were performed so as to cross-validate the three components. Their intercept values

were -0.071, -0.021, and -0.188 for feces (A), urine (B) and serum (C), respectively, thereby demonstrating the model's effectiveness.

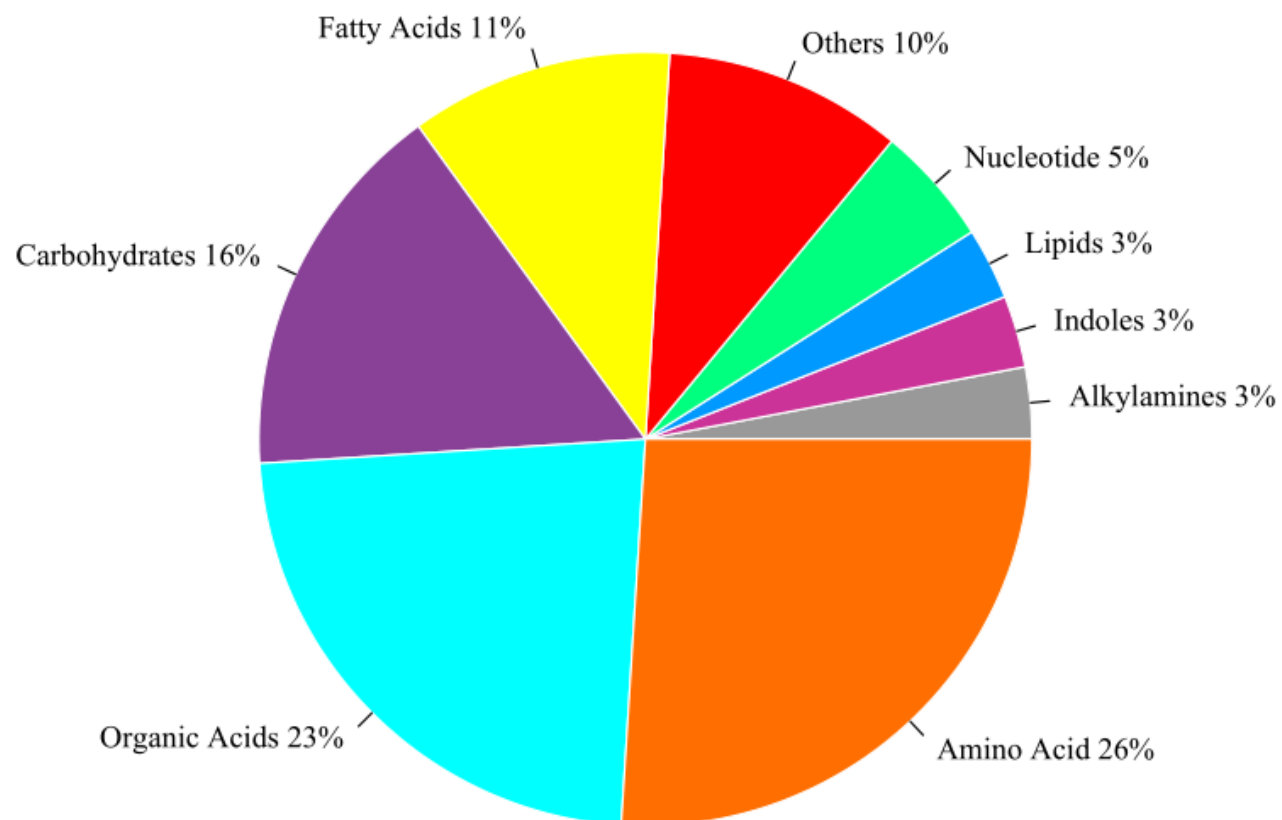

**Fig. S4.** Representative metabolite constituents and proportions obtained through LC-MS metabolomics and the JiaLibTM standard library, which contains more than 1,500 endogenous metabolites.

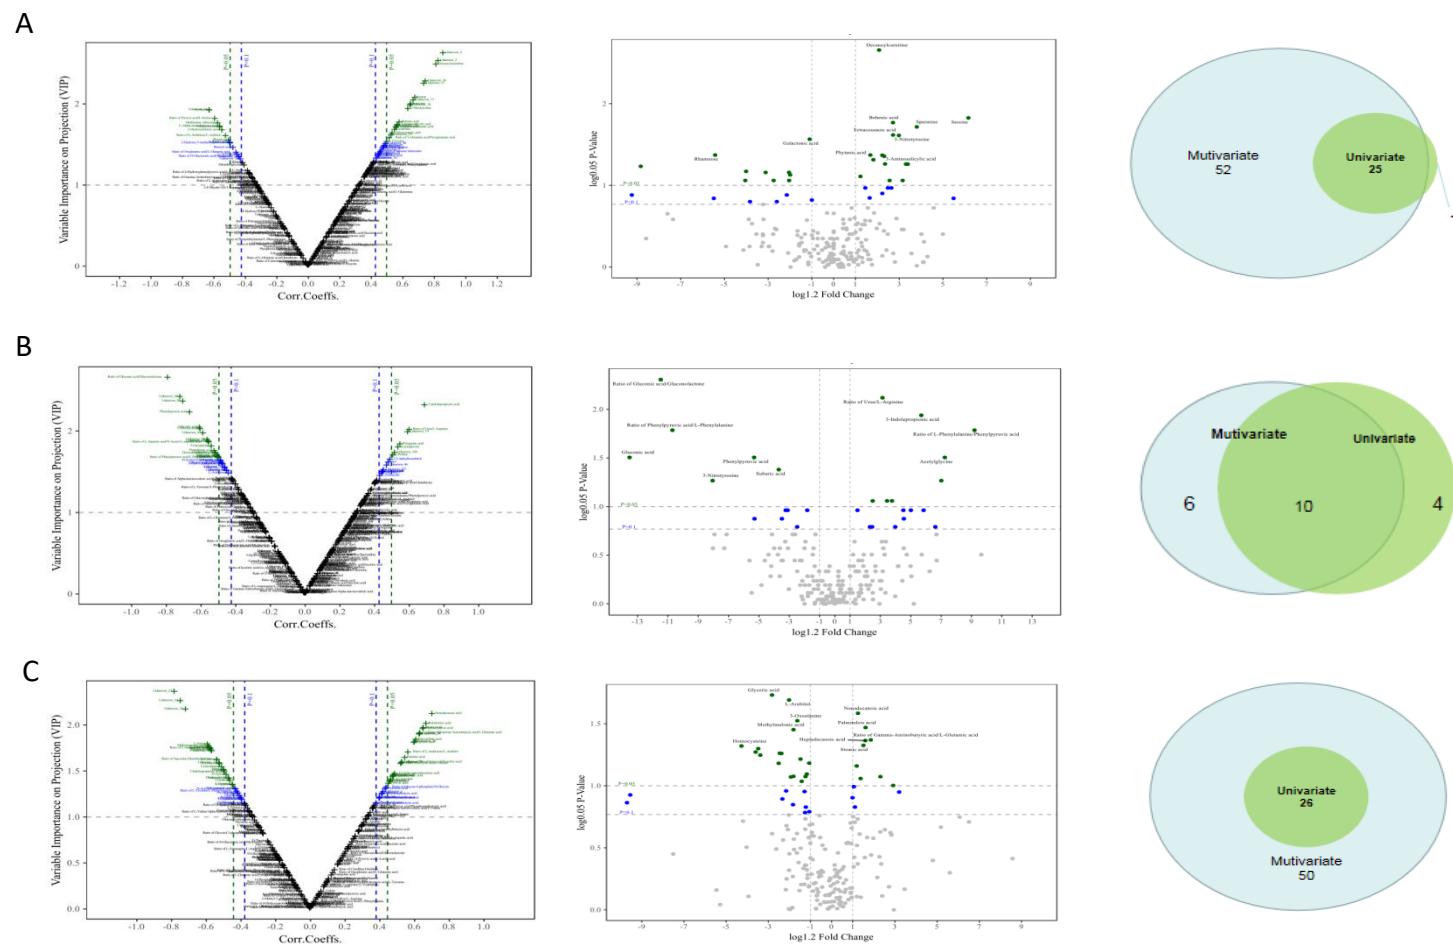

**Fig.S5.** Identification of the differential expressing candidate metabolites in feces (A), urine (B) and serum (C) samples in the Test set. (Left panel) The volcano plot (multi-dimensional analysis) revealed the differential expressing metabolites in feces (A), urine (B) and serum (C) samples through the multi-criteria assessment. The

green and blue cross shaped buddings present the metabolites within the cutoff value of variable importance in the project ( $VIP \geq 1$  and  $P\text{-value} < 0.05$  and  $0.01$ , respectively). The metabolites in the upper right corner in the image shown upregulation in the fatty liver samples, and metabolites in the upper left corner shown downregulation. (Middle panel) T test map (single-dimensional analysis) of the fecal (A), urine (B) and serum (C) samples. The green dots present the metabolites within the cutoff values of  $P\text{-value} < 0.05$  and the  $\log(\text{fold change}) \geq 1.2$ . (Right panel) Venn diagram displays the differential expressing metabolites in the feces (A), urine (B) and serum (C) samples under multi-dimensional and single-dimensional data analysis. Green and blue represent the number of metabolites identified by single- and multi- dimensional analysis, respectively. More detailed information about the intersected common metabolites was listed in Table S5-S7.

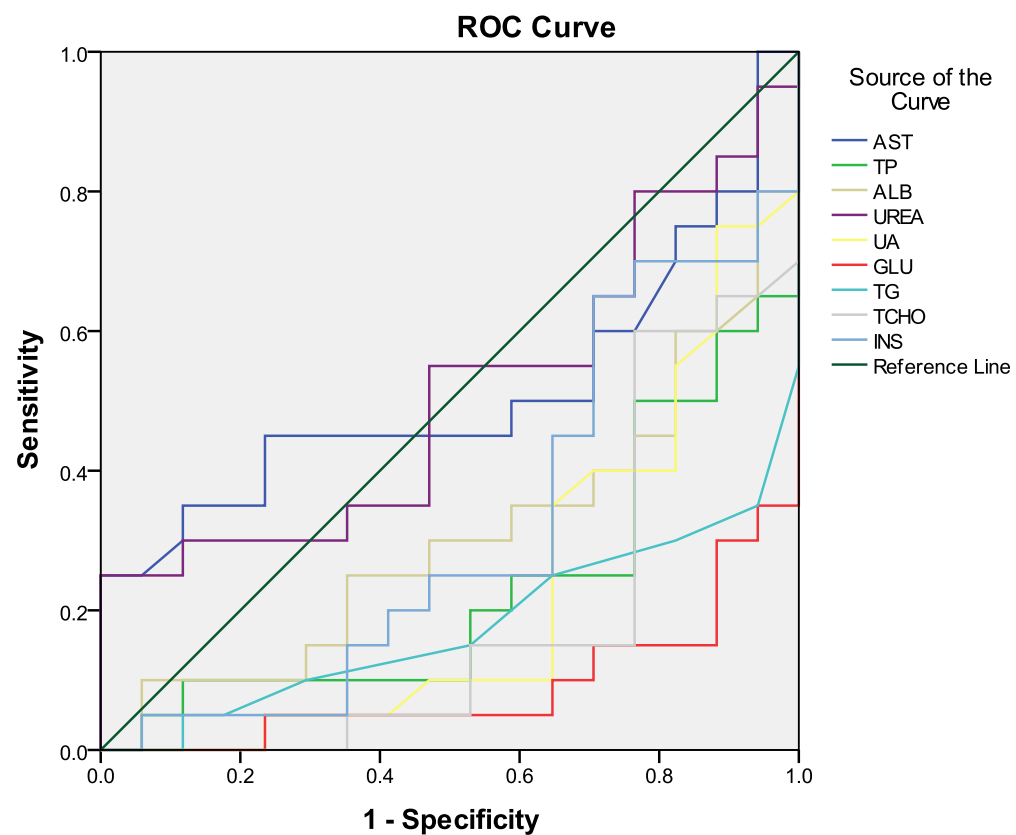

**Fig. S6.** Diagnostic performance examination of the traditional serum biochemical indicators using ROC (receiver operating characteristic) curve. The line with 45° slope in each panel is the reference boundary line with AUC (area under the curve) of 0.5, meaning the diagnostic method is effective or not. The higher AUC value is, the higher accuracy the diagnostic method is. The area under curve (AUC) values were listed in Table 2.



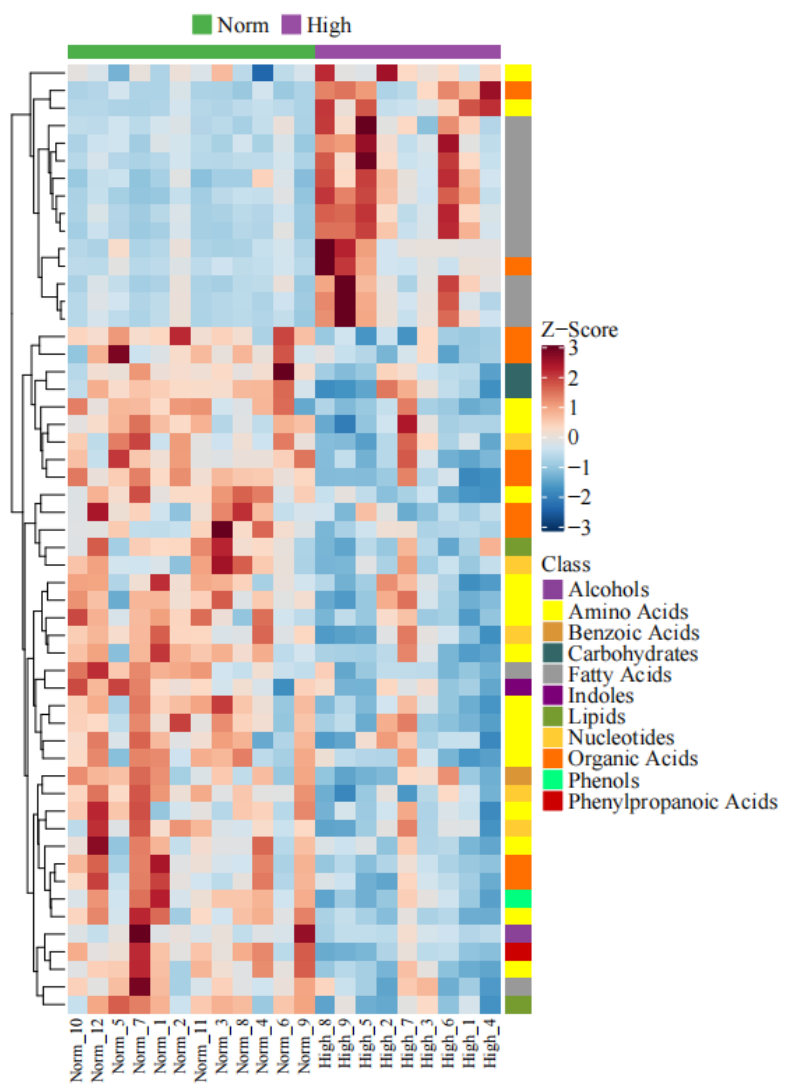



**Fig. S7.** Z-score Heatmap of the finally identified differentially expressing metabolites in Verification set, a third liver biopsy diagnosed dairy population. Norm represents serum samples from cows with normal liver (n=12), and High represents serum samples from fatty liver cows in their early postpartum period (n=8).

**Table S1. Information of biochemical serum indicators of the perinatal dairy cows involved in the Discovery set <sup>1</sup> and Test set <sup>2</sup> in the study**

| Serum index <sup>3</sup> | Discovery set |               |                | Test set                |                     |                |
|--------------------------|---------------|---------------|----------------|-------------------------|---------------------|----------------|
|                          | Normal (n=8)  | FL (n=10)     | <i>P</i> value | Suspected Normal (n=10) | Suspected FL (n=10) | <i>P</i> value |
| AST (IU/L)               | 89.00±23.88   | 173.00±110.68 | 0.061          | 88.86±20.36             | 171.55±40.21        | 0.052          |
| TP (g/L)                 | 71.58±11.54   | 66.32±10.48   | 0.32           | 67.01±7.08              | 49.83±6.84          | 2.29E-04       |
| NEFA (mmol/L)            | 1.39±0.85     | 2.93±2.06     | 0.066          | 1.41±0.61               | 4.25±1.83           | 0.0016         |
| OHB(mmol/L)              | 0.78±0.88     | 1.58±2.10     | 0.67           | 0.47±1.03               | 1.83±0.92           | 0.27           |
| GLU(mmol/L)              | 3.08±0.55     | 2.12±0.81     | 0.011          | 3.17±0.44               | 2.23±0.22           | 7.47E-05       |
| INS (pmol/ml)            | 0.36±0.34     | 0.24±0.30     | 0.43           | 0.31±0.34               | 0.25±0.13           | 0.16           |
| TG (g/L)                 | 0.13±0.029    | 0.11±0.033    | 0.23           | 0.13±0.03               | 0.084±0.016         | 0.0011         |
| TCHO (g/L)               | 2.08±0.55     | 1.62±0.26     | 0.032          | 2.23±0.58               | 1.45±0.29           | 0.0036         |
| ALB (g/L)                | 29.16±3.51    | 29.12±3.38    | 0.98           | 30.51±3.17              | 23.90±3.27          | 0.0012         |
| UREA (μmol/L)            | 3.34±0.80     | 4.05±2.27     | 0.41           | 4.22±1.00               | 3.95±1.12           | 0.64           |
| UA (mol/L)               | 39.13±7.72    | 33.5±10.36    | 0.22           | 43.85±16.89             | 27.44±8.23          | 0.022          |
| Parity No.               | 1.13±0.35     | 1.50±0.71     | 0.19           | 1.29±0.49               | 1.22±0.44           | 0.79           |
| Day in milk (day)        | 7±2           | 7±2           | 1.00           | 7±2                     | 7±2                 | 1.00           |
| Body weight (kg)         | 650±53        | 668±45        | 0.34           | 651±39                  | 658±48              | 0.62           |

<sup>1</sup> Discovery set, samples from cows diagnosed by liver biopsy.

<sup>2</sup> Test set, samples from cows diagnosed by serology.

<sup>3</sup> AST, aspartate aminotransferase; TP, total protein; NEFA, nonesterified fatty acid; OHB, β-Hydroxybutyrate; GLU, glucose; INS, insulin; TG, triglyceride; TCHO, total cholesterol; ALB,

albumin;UREA, urea nitrogen;UA, urea acid.

**Table. S2 Fecal candidate biomarkers identified by single- and multi-dimensional screening in the Discovery set <sup>1</sup>**

| Class         | Biomarker Name            | P value  | FC <sup>2</sup> | HMDB ID <sup>3</sup> | KEGG ID <sup>4</sup> | Associated Pathway                                                                                                                                                                       |
|---------------|---------------------------|----------|-----------------|----------------------|----------------------|------------------------------------------------------------------------------------------------------------------------------------------------------------------------------------------|
| /             | 3-hydroxypyridine         | 4.50E-04 | 0.403           | /                    | /                    | /                                                                                                                                                                                        |
|               | 3-Pyridylacetic acid      | 5.20E-04 | 0.534           | HMDB01538            | /                    | /                                                                                                                                                                                        |
|               | Petroselinic acid         | 2.70E-02 | 0.664           | HMDB02080            | C08363               | /                                                                                                                                                                                        |
| Organic Acids | Fumaric acid              | 2.00E-02 | 0.745           | HMDB00134            | C00122               | Arginine and Proline Metabolism; Aspartate Metabolism; Citric Acid Cycle; Mitochondrial Electron Transport Chain; Phenylalanine and Tyrosine Metabolism; Tyrosine Metabolism; Urea Cycle |
| Vitamin       | Alpha-Tocopherol          | 1.40E-03 | 0.545           | HMDB01893            | C02477               | /                                                                                                                                                                                        |
|               | 3-Aminoisobutanoic acid   | 4.40E-03 | 0.47            | HMDB03911            | C05145               | Pyrimidine Metabolism                                                                                                                                                                    |
|               | Ketoleucine               | 4.80E-03 | 1.256           | HMDB00695            | C00233               | Valine, Leucine and Isoleucine Degradation                                                                                                                                               |
|               | L-Alpha-aminobutyric acid | 8.50E-03 | 0.534           | HMDB00452            | C02356               | /                                                                                                                                                                                        |
|               | 5-Aminopentanoic acid     | 2.70E-02 | 0.382           | HMDB03355            | C00431               | /                                                                                                                                                                                        |
| Amino Acid    | Glycine                   | 2.70E-02 | 0.313           | HMDB00123            | C00037               | Alanine Metabolism,Ammonia Recycling; Bile Acid Biosynthesis; Carnitine Synthesis; Glutathione Metabolism; Glycine and Serine Metabolism, Methionine Metabolism; Porphyrin Metabolism    |
|               | Urea                      | 3.20E-02 | 0.154           | HMDB00294            | C00086               | Arginine and Proline Metabolism; Urea Cycle Amino Sugar Metabolism,Ammonia Recycling;                                                                                                    |
|               | L-Glutamine               | 3.40E-02 | 0.617           | HMDB00641            | C00064               | Glutamate Metabolism; Phenylacetate Metabolism; Purine Metabolism; Pyrimidine Metabolism; Transcription/Translation; Urea                                                                |

|               |                                          |          |       |                         |               |                                                                                                                                                                                                                                                      |
|---------------|------------------------------------------|----------|-------|-------------------------|---------------|------------------------------------------------------------------------------------------------------------------------------------------------------------------------------------------------------------------------------------------------------|
|               | Acetylglycine                            | 3.70E-02 | 0.789 | HMDB00532               | /             | Cycle                                                                                                                                                                                                                                                |
|               |                                          |          |       |                         |               | /                                                                                                                                                                                                                                                    |
|               | Ratio of<br>L-Asparagine/L-Aspartic acid | 4.10E-02 | 0.547 | HMDB00168/HMD<br>B00191 | C00152/C00049 | Ammonia Recycling; Aspartate<br>Metabolism,Transcription/Translation; Ammonia<br>Recycling; Arginine and Proline Metabolism;<br>Aspartate Metabolism; Beta-Alanine Metabolism;<br>Malate-Aspartate Shuttle;<br>Transcription/Translation; Urea Cycle |
| Phenols       | m-Cresol                                 | 8.50E-03 | 0.173 | HMDB02048               | C01467        | /                                                                                                                                                                                                                                                    |
| Alcohols      | Myoinositol                              | 8.70E-03 | 0.652 | HMDB00211               | C00137        | Galactose Metabolism; Inositol Metabolism;<br>Inositol Phosphate Metabolism;<br>Phosphatidylinositol Phosphate Metabolism                                                                                                                            |
| Aromatic      | 3,4-Dihydro-2H-1-benzopyran-<br>2-one    | 1.20E-02 | 0.75  | HMDB36626               | C02274        | /                                                                                                                                                                                                                                                    |
| aldehydes     | Glyceraldehyde                           | 1.80E-02 | 0.5   | HMDB01051               | C02154        | Glycerolipid Metabolism                                                                                                                                                                                                                              |
|               | Glucose 1-phosphate                      | 2.70E-02 | 0.757 | HMDB01586               | C00103        | Galactose Metabolism; Gluconeogenesis,<br>Glycolysis, Lactose Synthesis; Nucleotide Sugars<br>Metabolism; Starch and Sucrose Metabolism                                                                                                              |
| Carbohydrates | D-Glucuronic acid                        | 3.70E-02 | 0.471 | HMDB00127               | C00191        | Inositol Metabolism; Starch and Sucrose<br>Metabolism                                                                                                                                                                                                |
| Fatty Acids   | Arachidonic acid                         | 2.90E-02 | 0.442 | HMDB01043               | C00219        | Alpha Linolenic Acid and Linoleic Acid<br>Metabolism; Arachidonic Acid Metabolism                                                                                                                                                                    |
|               | Behenic acid                             | 4.10E-02 | 1.203 | HMDB00944               | C08281        | /                                                                                                                                                                                                                                                    |

<sup>1</sup> In the Discovery set (samples from cows diagnosed by liver biopsy), the feces metabolites with significant difference in the normal and fatty liver dairy cows were identified through VIP multi-dimensional test (VIP > 1) and then single-dimensional *t* test (*P* < 0.05).

<sup>2</sup> FC, fold change, indicating the relative differential expression level of the metabolite in fatty liver and normal dairy cows.

<sup>3</sup> HMDB ID: ID number in Human Metabolome Database that the metabolite corresponds to.

<sup>4</sup> KEGG ID: ID number of the biological information database that the metabolic pathway corresponds to.

**Table S3. Urine candidate biomarkers identified by single- and multi-dimensional screening in the Discovery set <sup>1</sup>**

| Class       | Biomarker Name                              | <i>P</i> value | FC <sup>2</sup> | HMDB ID <sup>3</sup> | KEGG ID <sup>4</sup> | Associated Pathway                                                                                                                       |
|-------------|---------------------------------------------|----------------|-----------------|----------------------|----------------------|------------------------------------------------------------------------------------------------------------------------------------------|
| Amino Acid  | Salicyluric acid                            | 7.80E-04       | 0.439           | HMDB00840            | C07588               | /                                                                                                                                        |
|             | Alpha-ketoisovaleric acid                   | 7.80E-03       | 1.95            | HMDB00019            | C00141               | Valine, Leucine and Isoleucine Degradation                                                                                               |
|             | Ratio of Alpha-ketoisovaleric acid/L-Valine | 7.80E-03       | 2.776           | HMDB00019/HMDB00883  | C00141/C00183        | Valine, Leucine and Isoleucine Degradation; Propanoate Metabolism, Transcription/Translation, Valine, Leucine and Isoleucine Degradation |
| Amino Acid  | Ratio of L-Valine/Alpha-ketoisovaleric acid | 7.80E-03       | 0.36            | HMDB00883/HMDB00019  | C00183/C00141        | Valine, Leucine and Isoleucine Degradation; Propanoate Metabolism, Transcription/Translation, Valine, Leucine and Isoleucine Degradation |
| Alkylamines | 3-Nitrotyrosine                             | 3.10E-02       | 0.256           | HMDB01904            | /                    | /                                                                                                                                        |
|             | Spermidine                                  | 1.90E-02       | 0.351           | HMDB01257            | C00315               | Methionine Metabolism, Spermidine and Spermine Biosynthesis                                                                              |
| Fatty Acids | Linoleic acid                               | 4.00E-02       | 1.452           | HMDB00673            | C01595               | Alpha Linolenic Acid and Linoleic Acid Metabolism                                                                                        |

<sup>1</sup> In the Discovery set (samples from cows diagnosed by liver biopsy), the urine metabolites with significant difference in the normal and fatty liver dairy cows were identified through VIP multi-dimensional test ( $VIP > 1$ ) and then single-dimensional t test ( $P < 0.05$ ).

<sup>2</sup> FC, fold change, indicating the relative differential expression level of the metabolite in fatty liver and normal dairy cows.

<sup>3</sup> HMDB ID: ID number in Human Metabolome Database that the metabolite corresponds to.

<sup>4</sup> KEGG ID: ID number of the biological information database that the metabolic pathway corresponds to.



**Table S4. Serum candidate biomarkers identified by single- and multi-dimensional screening in the Discovery set<sup>1</sup>.**

| Class         | Name                                  | FC <sup>2</sup> | <i>P</i> value | HMDB ID <sup>3</sup> | KEGG ID <sup>4</sup> | Associated Pathway                                                                                                                                                                  |
|---------------|---------------------------------------|-----------------|----------------|----------------------|----------------------|-------------------------------------------------------------------------------------------------------------------------------------------------------------------------------------|
| Amino Acid    | L-Asparagine                          | 0.58            | 8.70E-04       | HMDB00168            | C00152               | Ammonia Recycling; Aspartate Metabolism,Transcription/Translation                                                                                                                   |
|               | L-Glutamine                           | 0.514           | 8.70E-04       | HMDB00641            | C00064               | Amino Sugar Metabolism; Ammonia Recycling; Glutamate Metabolism; Phenylacetate Metabolism; Purine Metabolism; Pyrimidine Metabolism,Transcription/Translation; Urea Cycle           |
|               | 2-Hydroxybutyric acid                 | 2.016           | 4.40E-03       | HMDB00008            | C05984               | /                                                                                                                                                                                   |
|               | L-Serine                              | 0.579           | 2.70E-02       | HMDB00187            | C00065               | Ammonia Recycling; Glycine and Serine Metabolism; Homocysteine Degradation; Methionine Metabolism; Sphingolipid Metabolism                                                          |
|               | L-Histidine                           | 0.804           | 4.30E-02       | HMDB00177            | C00135               | Ammonia Recycling; Histidine Metabolism; Transcription/Translation                                                                                                                  |
|               | Ratio of L-Tyrosine / L-Phenylalanine | 0.685           | 4.30E-02       | HMDB00158/HM DB00159 | C00082/C00079        | Catecholamine Biosynthesis; Phenylalanine and Tyrosine Metabolism; Transcription/Translation; Tyrosine Metabolism; Phenylalanine and Tyrosine Metabolism; Transcription/Translation |
| Organic Acids | 4-Hydroxybenzoic acid                 | 1.292           | 4.40E-03       | HMDB00500            | C00156               | Ubiquinone Biosynthesis                                                                                                                                                             |
| /             | 1-Octanoyl-rac-glycerol               | 0.427           | 8.50E-03       | /                    | /                    | /                                                                                                                                                                                   |
| Carbohydrates | D-Glucuronic acid                     | 0.531           | 1.20E-02       | HMDB00127            | C00191               | Inositol Metabolism; Starch and Sucrose Metabolism                                                                                                                                  |

|               |                                |       |          |           |        |                                                                                                                |
|---------------|--------------------------------|-------|----------|-----------|--------|----------------------------------------------------------------------------------------------------------------|
|               | Mannitol                       | 0.597 | 1.60E-02 | HMDB00765 | C00392 | /                                                                                                              |
|               | Sucrose                        | 2.11  | 2.10E-02 | HMDB00258 | C00089 | Galactose Metabolism; Starch and Sucrose Metabolism                                                            |
|               | Palmitoleic acid               | 2.191 | 1.20E-02 | HMDB03229 | C08362 | /                                                                                                              |
| Fatty Acids   | Palmitic acid                  | 1.989 | 2.10E-02 | HMDB00220 | C00249 | Fatty Acid Biosynthesis; Fatty Acid Elongation In Mitochondria; Fatty acid Metabolism; Glycerolipid Metabolism |
|               | Nonadecanoic acid              | 1.678 | 2.70E-02 | HMDB00772 | C16535 | /                                                                                                              |
| Fatty Acids   | Stearic acid                   | 1.819 | 2.70E-02 | HMDB00827 | C01530 | Mitochondrial Beta-Oxidation of Long Chain Saturated Fatty Acids; Plasmalogen Synthesis                        |
|               | Arachidic acid                 | 1.394 | 3.40E-02 | HMDB02212 | C06425 | /                                                                                                              |
|               | Heptadecanoic acid             | 2.272 | 3.40E-02 | HMDB02259 | /      | /                                                                                                              |
| Lipids        | Cholesterol                    | 0.828 | 1.60E-02 | HMDB00067 | C00187 | Bile Acid Biosynthesis; Steroid Biosynthesis; Steroidogenesis                                                  |
| Esters        | Cyclohexaneundecanoic acid     | 2.07  | 2.10E-02 | HMDB30997 | C12100 | /                                                                                                              |
| Indoles       | Serotonin                      | 0.548 | 2.10E-02 | HMDB00259 | C00780 | Tryptophan Metabolism                                                                                          |
|               | 3-Hydroxybutyric acid          | 1.682 | 2.60E-02 | HMDB00357 | C01089 | Fatty Acid Biosynthesis                                                                                        |
|               | 2-Hydroxy-3-methylbutyric acid | 1.853 | 2.70E-02 | HMDB00407 | /      | /                                                                                                              |
| Organic Acids | Petroselinic acid              | 2.831 | 2.70E-02 | HMDB02080 | C08363 | /                                                                                                              |
|               | Taurine                        | 0.562 | 4.30E-02 | HMDB00251 | C00245 | Bile Acid Biosynthesis, Taurine and Hypotaurine Metabolism                                                     |

<sup>1</sup> In the Discovery set (samples from cows diagnosed by liver biopsy), the serum metabolites with significant difference in the normal and fatty liver dairy cows were identified through VIP multi-dimensional test (VIP > 1) and then single-dimensional t test ( $P < 0.05$ ).

<sup>2</sup> FC, fold change, indicating the relative differential expression level of the metabolite in fatty liver and normal dairy cows.

<sup>3</sup> HMDB ID: ID number in Human Metabolome Database that the metabolite corresponds to.

<sup>4</sup> KEGG ID: ID number of the biological information database that the metabolic pathway corresponds to.

**Table S5. Fecal candidate biomarkers identified by single- and multi-dimensional screening in the Test set <sup>1</sup>.**

| Class         | Name                                       | FC <sup>2</sup> | P value  | HMDB ID <sup>3</sup>    | KEGG ID <sup>4</sup> | Associated Pathway                                                                                                                                             |
|---------------|--------------------------------------------|-----------------|----------|-------------------------|----------------------|----------------------------------------------------------------------------------------------------------------------------------------------------------------|
| Organic Acids | 3-Aminosalicylic acid                      | 1.5             | 1.70E-02 | HMDB01972               | /                    | /                                                                                                                                                              |
| Fatty Acids   | Arachidic acid                             | 1.535           | 2.30E-02 | HMDB02212               | C06425               | /                                                                                                                                                              |
|               | Behenic acid                               | 1.64            | 5.00E-03 | HMDB00944               | C08281               | /                                                                                                                                                              |
|               | Tetracosanoic acid                         | 1.641           | 7.90E-03 | HMDB02003               | C08320               | Beta Oxidation of Very Long Chain Fatty Acids                                                                                                                  |
| Lipids        | Decanoylcarnitine                          | 1.46            | 3.50E-04 | HMDB00651               | /                    | /                                                                                                                                                              |
| Carbohydrates | Erythrose                                  | 0.481           | 3.00E-02 | HMDB02649               | C01796               | /                                                                                                                                                              |
|               | Galactonic acid                            | 0.818           | 9.20E-03 | HMDB00565               | C00880               | /                                                                                                                                                              |
|               | Rhamnose                                   | 0.372           | 1.60E-02 | HMDB00849               | C00507               | /                                                                                                                                                              |
| Nucleotide    | Inosine                                    | 3.077           | 4.20E-03 | HMDB00195               | C00294               | Purine Metabolism                                                                                                                                              |
| Amino Acid    | 2-Hydroxybutyric acid                      | 0.606           | 4.20E-02 | HMDB00008               | C05984               | /                                                                                                                                                              |
|               | 3-Nitrotyrosine                            | 1.722           | 8.00E-03 | HMDB01904               | /                    | /                                                                                                                                                              |
|               | Creatinine                                 | 1.392           | 2.00E-02 | HMDB00562               | C00791               | /                                                                                                                                                              |
|               | L-Alpha-aminobutyric acid                  | 0.696           | 3.40E-02 | HMDB00452               | C02356               | /                                                                                                                                                              |
|               | L-Lysine                                   | 1.855           | 2.30E-02 | HMDB00182               | C00047               | Biotin Metabolism; Carnitine Synthesis; Lysine Degradation; Transcription/Translation                                                                          |
|               | L-Tyrosine                                 | 1.827           | 2.30E-02 | HMDB00158               | C00082               | Catecholamine Biosynthesis; Phenylalanine and Tyrosine Metabolism; Transcription/Translation; Tyrosine Metabolism                                              |
|               | Methionine sulfoxide                       | 0.2             | 2.50E-02 | HMDB02005               | /                    | Methionine Metabolism                                                                                                                                          |
|               | Ratio of L-Glutamic acid/Pyroglutamic acid | 1.777           | 4.20E-02 | HMDB00148/<br>HMDB00267 | C00025/C01879        | Alanine Metabolism; Amino Sugar Metabolism; Ammonia Recycling; Arginine and Proline Metabolism; Cysteine Metabolism; Folate Metabolism; Glucose-Alanine Cycle; |

|             |                                |       |          |                     |               |                                                                                                                                                                                                                                                                                                                                                                                                                               |
|-------------|--------------------------------|-------|----------|---------------------|---------------|-------------------------------------------------------------------------------------------------------------------------------------------------------------------------------------------------------------------------------------------------------------------------------------------------------------------------------------------------------------------------------------------------------------------------------|
|             |                                |       |          |                     |               | Glutamate Metabolism; Glutathione Metabolism; Glycine and Serine Metabolism; Histidine Metabolism; Malate-Aspartate Shuttle; Transcription/Translation; Urea Cycle; Glutathione Metabolism                                                                                                                                                                                                                                    |
|             | Ratio of Pyruvic acid/L-Serine | 0.567 | 3.10E-02 | HMDB00243/HMDB00187 | C00022/C00065 | Ammonia Recycling; Glycine and Serine Metabolism; Homocysteine Degradation; Methionine Metabolism; Sphingolipid Metabolism; Alanine Metabolism; Amino Sugar Metabolism; Ammonia Recycling; Citric Acid Cycle; Cysteine Metabolism; Gluconeogenesis, Glucose-Alanine Cycle; Glycine and Serine Metabolism; Glycolysis; Pyruvaldehyde Degradation; Pyruvate Metabolism; Transfer of Acetyl Groups into Mitochondria; Urea Cycle |
| Alkylamines | Spermine                       | 2     | 5.80E-03 | HMDB01256           | C00750        | Spermidine and Spermine Biosynthesis                                                                                                                                                                                                                                                                                                                                                                                          |

<sup>1</sup> In the Test set (samples from cows diagnosed by serology), the feces metabolites with significant difference in the normal and fatty liver dairy cows were identified through VIP multi-dimensional test ( $VIP > 1$ ) and then single-dimensional t test ( $P < 0.05$ ).

<sup>2</sup> FC, fold change, indicating the relative differential expression level of the metabolite in fatty liver and normal dairy cows.

<sup>3</sup> HMDB ID: ID number in Human Metabolome Database that the metabolite corresponds to.

<sup>4</sup> KEGG ID: ID number of the biological information database that the metabolic pathway corresponds to.

**Table. S6 Urine candidate biomarkers identified by single- and multi-dimensional screening in the Test set <sup>1</sup>.**

| <b>Class</b>  | <b>Name</b>                                | <b>FC <sup>2</sup></b> | <b>P value</b> | <b>HMDB ID <sup>3</sup></b> | <b>KEGG ID <sup>4</sup></b> | <b>Associated Pathway</b>                                                                                                                                   |
|---------------|--------------------------------------------|------------------------|----------------|-----------------------------|-----------------------------|-------------------------------------------------------------------------------------------------------------------------------------------------------------|
| Indoles       | 3-Indolepropionic acid                     | 2.825                  | 3.00E-03       | HMDB02302                   | /                           | /                                                                                                                                                           |
| Amino Acid    | 3-Nitrotyrosine                            | 0.23                   | 2.20E-02       | HMDB01904                   | /                           | /                                                                                                                                                           |
|               | Acetylglycine                              | 3.748                  | 1.10E-02       | HMDB00532                   | /                           | /                                                                                                                                                           |
|               | Ratio of Urea/L-Arginine                   | 1.772                  | 1.70E-03       | HMDB00294/HMDB00517         | C00086/C00062               | Arginine and Proline Metabolism; Urea Cycle;<br>Arginine and Proline Metabolism; Glycine and<br>Serine Metabolism; Transcription/Translation;<br>Urea Cycle |
| Carbohydrates | Gluconic acid                              | 0.085                  | 1.10E-02       | HMDB00625                   | C00257                      | /                                                                                                                                                           |
|               | Ratio of Gluconic acid /<br>Gluconolactone | 0.123                  | 1.00E-03       | HMDB00625/HMDB00150         | C00257/C00198               | Pentose Phosphate Pathway                                                                                                                                   |
| Fatty Acids   | Pelargonic acid                            | 3.593                  | 2.20E-02       | HMDB00847                   | C01601                      | /                                                                                                                                                           |
| Organic Acids | Phenylpyruvic acid                         | 0.379                  | 1.10E-02       | HMDB00205                   | C00166                      | Phenylalanine and Tyrosine Metabolism                                                                                                                       |
|               | Suberic acid                               | 0.51                   | 1.60E-02       | HMDB00893                   | C08278                      | /                                                                                                                                                           |

<sup>1</sup> In the Test set (samples from cows diagnosed by serology), the urine metabolites with significant difference in the normal and fatty liver dairy cows were identified through VIP multi-dimensional test (VIP > 1) and then single-dimensional t test ( $P < 0.05$ ).

<sup>2</sup> FC, fold change, indicating the relative differential expression level of the metabolite in fatty liver and normal dairy cows.

<sup>3</sup> HMDB ID: ID number in Human Metabolome Database that the metabolite corresponds to.

<sup>4</sup> KEGG ID: ID number of the biological information database that the metabolic pathway corresponds to.

**Table S7. Serum candidate biomarkers identified by single- and multi-dimensional screening in the Test set <sup>1</sup>**

| Class         | Name                            | FC <sup>2</sup> | P value  | HMDB ID <sup>3</sup>    | KEGG ID <sup>4</sup> | Associated Pathway                                                                                                                                                                 |
|---------------|---------------------------------|-----------------|----------|-------------------------|----------------------|------------------------------------------------------------------------------------------------------------------------------------------------------------------------------------|
| Carbohydrates | D-Galactose                     | 0.764           | 2.60E-02 | HMDB00143               | C00984               | Galactose Metabolism; Lactose Degradation;<br>Nucleotide Sugars Metabolism                                                                                                         |
|               | D-Xylose                        | 0.824           | 2.90E-02 | HMDB00098               | C00181               | /                                                                                                                                                                                  |
|               | L-Arabitol                      | 0.692           | 6.30E-03 | HMDB01851               | C00532               | /                                                                                                                                                                                  |
|               | Ratio of L-Arabinose/L-Arabitol | 1.241           | 3.10E-02 | HMDB00646/HMD<br>B01851 | C00259/C00532        | /                                                                                                                                                                                  |
|               | Ribitol                         | 0.703           | 4.00E-02 | HMDB00508               | C00474               | /                                                                                                                                                                                  |
| Organic Acids | Glyceric acid                   | 0.597           | 5.60E-03 | HMDB00139               | C00258               | Glycerolipid Metabolism; Glycine and Serine<br>Metabolism                                                                                                                          |
|               | Hippuric acid                   | 0.53            | 2.00E-02 | HMDB00714               | C01586               | /                                                                                                                                                                                  |
|               | Methylmalonic acid              | 0.719           | 1.30E-02 | HMDB00202               | C02170               | Propanoate Metabolism; Valine, Leucine and<br>Isoleucine Degradation                                                                                                               |
|               | Petroselinic acid               | 1.524           | 4.00E-02 | HMDB02080               | C08363               | /                                                                                                                                                                                  |
|               | Homocysteine                    | 0.459           | 1.90E-02 | HMDB00742               | NA                   | Betaine Metabolism; Catecholamine Biosynthesis;<br>Glycine and Serine Metabolism; Homocysteine<br>Degradation; Methionine Metabolism                                               |
| Amino Acid    | 3-Oxoalanine                    | 0.743           | 1.00E-02 | HMDB11602               | NA                   | /                                                                                                                                                                                  |
|               | L-Asparagine                    | 0.648           | 2.30E-02 | HMDB00168               | C00152               | Ammonia Recycling; Aspartate Metabolism;<br>Transcription/Translation                                                                                                              |
|               | L-Cysteine                      | 0.798           | 4.00E-02 | HMDB00574               | NA                   | Cysteine Metabolism; Glutathione Metabolism;<br>Glycine and Serine Metabolism; Methionine<br>Metabolism; Pantothenate and CoA Biosynthesis;<br>Taurine and Hypotaurine Metabolism; |

|             |                                                  |       |          |                     |               |                                                                                                                                                                                                                                                                                                                                                         |
|-------------|--------------------------------------------------|-------|----------|---------------------|---------------|---------------------------------------------------------------------------------------------------------------------------------------------------------------------------------------------------------------------------------------------------------------------------------------------------------------------------------------------------------|
|             |                                                  |       |          |                     |               | Transcription/Translation                                                                                                                                                                                                                                                                                                                               |
|             | L-Cystine                                        | 0.638 | 2.30E-02 | HMDB00192           | C00491        | /                                                                                                                                                                                                                                                                                                                                                       |
|             | L-Serine                                         | 0.518 | 2.20E-02 | HMDB00187           | C00065        | Ammonia Recycling; Glycine and Serine Metabolism; Homocysteine Degradation; Methionine Metabolism; Sphingolipid Metabolism                                                                                                                                                                                                                              |
|             | Ratio of Gamma-Aminobutyric acid/L-Glutamic acid | 1.401 | 1.70E-02 | HMDB00112/HMDB00148 | C00334/C00025 | Glutamate Metabolism; Alanine Metabolism; Amino Sugar Metabolism; Ammonia Recycling; Arginine and Proline Metabolism; Cysteine Metabolism; Folate Metabolism; Glucose-Alanine Cycle; Glutamate Metabolism; Glutathione Metabolism; Glycine and Serine Metabolism; Histidine Metabolism; Malate-Aspartate Shuttle; Transcription/Translation; Urea Cycle |
|             | Myristic acid                                    | 1.284 | 4.20E-02 | HMDB00806           | C06424        | Fatty Acid Biosynthesis                                                                                                                                                                                                                                                                                                                                 |
|             | Nonadecanoic acid                                | 1.256 | 8.70E-03 | HMDB00772           | C16535        | /                                                                                                                                                                                                                                                                                                                                                       |
| Fatty Acids | Palmitoleic acid                                 | 1.34  | 1.20E-02 | HMDB03229           | C08362        | /                                                                                                                                                                                                                                                                                                                                                       |
|             | Heptadecanoic acid                               | 1.338 | 1.70E-02 | HMDB02259           | NA            | /                                                                                                                                                                                                                                                                                                                                                       |
|             | Stearic acid                                     | 1.316 | 1.90E-02 | HMDB00827           | C01530        | Mitochondrial Beta-Oxidation of Long Chain Saturated Fatty Acids; Plasmalogen Synthesis                                                                                                                                                                                                                                                                 |
| Nucleotide  | Uridine                                          | 0.54  | 2.40E-02 | HMDB00296           | C00299        | Pyrimidine Metabolism                                                                                                                                                                                                                                                                                                                                   |

<sup>1</sup> In the Test set (samples from cows diagnosed by serology), the serum metabolites with significant difference in the normal and fatty liver dairy cows were identified through VIP multi-dimensional test ( $VIP > 1$ ) and then unit t test ( $P < 0.05$ ).

<sup>2</sup> FC, fold change, indicating the relative differential expression level of the metabolite in fatty liver and normal dairy cows.

<sup>3</sup> HMDB ID: ID number in Human Metabolome Database that the metabolite corresponds to.

<sup>4</sup> KEGG ID: ID number of the biological information database that the metabolic pathway corresponds to.



**Table S8. Significant pathways enriched by differentially expressing metabolites in serum and feces from dairy cows in the Discovery set<sup>1</sup> and Test set<sup>2</sup>.**

| Metabolite sources | Pathway Name                                | <i>P</i> -hyper | Up-regulated metabolites                                | Down-regulated metabolites                                   |
|--------------------|---------------------------------------------|-----------------|---------------------------------------------------------|--------------------------------------------------------------|
| Serum              | Arginine biosynthesis                       | <0.01           | Fumaric acid                                            | L-Arginine; L-Aspartic acid; L-Glutamine                     |
|                    | Alanine, aspartate and glutamate metabolism | <0.01           | Fumaric acid                                            | L-Alanine; L-Asparagine; L-Aspartic acid; L-Glutamine        |
|                    | Arginine and proline metabolism             | <0.05           | Spermidine                                              | 4-Hydroxyproline; Creatine; L-Arginine; L-Proline            |
|                    | Biosynthesis of unsaturated fatty acids     | <0.05           | Arachidic acid; Oleic acid; Palmitic acid; Stearic acid |                                                              |
|                    | Histidine metabolism                        | <0.05           |                                                         | 1-Methylhistidine; L-Aspartic acid; L-Histidine              |
|                    | Cysteine and methionine metabolism          | <0.05           |                                                         | Homocysteine; L-Cysteine; L-Methionine; L-Serine             |
|                    | Pantothenate and CoA biosynthesis           | <0.05           |                                                         | L-Aspartic acid; L-Cysteine; Pantothenic acid                |
|                    | Glycine, serine and threonine metabolism    | <0.05           |                                                         | Creatine; L-Cysteine; L-Serine; L-Threonine                  |
|                    | Taurine and hypotaurine metabolism          | <0.05           |                                                         | L-Cysteine; Taurine                                          |
|                    | beta-Alanine metabolism                     | <0.05           | Spermidine                                              | L-Aspartic acid; L-Histidine                                 |
| Feces              | Pentose and glucuronate interconversions    | <0.01           |                                                         | D-Glucuronic acid; D-Xylose; Glucose 1-phosphate; L-Arabitol |

<sup>1</sup> Discovery set, samples from cows diagnosed by liver biopsy.

<sup>2</sup> Test set, samples from cows diagnosed by serological detection.
